# Supplementary material for: The Extent and Nature of Food and Beverage Company Sponsorship of Children’s Sports Clubs in Canada: A Pilot Study
Source: MDPI journal article supplement (doi:10.3390/ijerph17093023), 2020-04-27
Supplement: s1 [file s1]

**Title:** The extent and nature of food and beverage company sponsorship of children's sports clubs in Canada: A pilot study

**Authors:** E. Pauzé, O. Ekeh, M. Potvin Kent

**Supplementary Table S1** Number of sponsors of children's sports clubs in Ottawa (Canada) by sector

| Sector                                              | n (%)     |
|-----------------------------------------------------|-----------|
| Sports-related goods, services and retailers        | 79 (25.3) |
| Food companies                                      | 51 (16.3) |
| Construction/renovation companies                   | 33 (10.6) |
| Automobile-related retailers and services           | 25 (8.0)  |
| Health-related services                             | 20 (6.4)  |
| Financial services                                  | 17 (5.4)  |
| Other                                               | 18 (5.8)  |
| Non-commercial sponsors                             | 15 (4.8)  |
| Business services                                   | 12 (3.8)  |
| Insurance companies or brokers                      | 10 (3.2)  |
| Hardware stores                                     | 9 (2.9)   |
| Cleaning and environmental services                 | 6 (1.9)   |
| Realtor and property management companies           | 6 (1.9)   |
| Hospitality services (e.g. hotel, cruise companies) | 5 (1.6)   |
| Gambling                                            | 2 (0.6)   |
| Supplement companies                                | 2 (0.6)   |
| Unknown                                             | 2 (0.6)   |

**Title:** The extent and nature of food and beverage company sponsorship of children's sports clubs in Canada: A pilot study

**Authors:** E. Pauzé, O. Ekeh, M. Potvin Kent

**Supplementary Table S2** Description of foods served by restaurant type

| <b>Restaurant category</b>         | <b>Type of foods served</b>                                                                                                                                                                                     | <b>Restaurant name</b>                                                                                                                                                                                                                                                       |
|------------------------------------|-----------------------------------------------------------------------------------------------------------------------------------------------------------------------------------------------------------------|------------------------------------------------------------------------------------------------------------------------------------------------------------------------------------------------------------------------------------------------------------------------------|
| Grills/Sports Bars/Pub restaurants | Sit-down restaurants serving alcohol and a variety of dishes including burgers and sandwiches, pasta dishes, steak, ribs, salads, fish and chips, pizza, nachos, chicken wings and some ethnic dishes           | Boston Pizza<br>Big Rig Kitchen and Brewery<br>Jack Astor's Bar and Grill<br>Lone Star Texas Grill<br>D'Arcy McGee's<br>Broadway Bar and Grill<br>Don Cherry's Sports Grill<br>Hurley's Grill<br>Chances R Restaurant<br>Swan on the Rideau<br>Tail Gators<br>KS on the Keys |
| Diners                             | Sit-down restaurants that serve breakfast and a variety of entrees (e.g. burgers and sandwiches, chicken strips, meat loaf)                                                                                     | Denny's<br>Steele's restaurant                                                                                                                                                                                                                                               |
| Rotisserie chicken restaurants     | Sit-down restaurants whose primary menu item is roasted chicken which is served in various dishes (soups, sandwiches, quarter/half chicken meals)                                                               | Swiss Chalet                                                                                                                                                                                                                                                                 |
| Fast food pizza restaurants        | Fast food restaurant whose primary menu item is pizza. Other sold food items may include appetizers such as bread sticks, chicken wings, onion rings and nachos and other meals such as sandwiches and poutine. | Milano's Pizza<br>Jo-Jo's Pizza                                                                                                                                                                                                                                              |
| Fast food burger restaurant        | Fast food restaurant whose primary menu items include beef burgers, chicken sandwiches or wraps, chicken nuggets, fries,                                                                                        | McDonald's                                                                                                                                                                                                                                                                   |

|                                            |                                                                                                                                                                                        |                                              |
|--------------------------------------------|----------------------------------------------------------------------------------------------------------------------------------------------------------------------------------------|----------------------------------------------|
|                                            | frozen desserts, breakfast sandwiches                                                                                                                                                  |                                              |
| Fast food café restaurant                  | Fast food restaurant whose primary menu items include coffee drinks, donuts and other sweet pastries, sandwiches made with deli and other processed meats, soups, breakfast sandwiches | Tim Hortons                                  |
| Fast food sandwich and/or salad restaurant | Fast food restaurants whose primary menu items include customized sandwiches and/or salads and who offer a variety of vegetable toppings                                               | Pita Pit<br>Freshii                          |
| Restaurants serving ethnic foods           | Restaurants that exclusively or primarily sell ethnic foods (e.g. Italian restaurant, Lebanese shawarma restaurant)                                                                    | Victoria Trattoria<br>Prince Gourmet Orleans |
